# Supplementary material
Source: HighWire-hosted journal article supplement (http://www.cmaj.ca/highwire/filestream/80438/field_highwire_adjunct_files/1/210437-res-2-at.pdf)
Supplement: 210437-res-2-at.pdf [file 210437-res-2-at.pdf]

Table S2 – Comparison of estimated total physician payments and FFS payments (i.e., estimated payments from alternative payment plans in 2017

| Specialty                            | Difference between estimated total physician payments and FFS payments in 2017 |
|--------------------------------------|--------------------------------------------------------------------------------|
| ANAESTHESIA                          | 59226                                                                          |
| CARDIOLOGY                           | 30203                                                                          |
| DERMATOLOGY                          | -9833                                                                          |
| FAMILY PRACTICE AND GENERAL PRACTICE | 95629                                                                          |
| GASTROENTEROLOGY                     | 38740                                                                          |
| GENERAL SURGERY                      | 31982                                                                          |
| INTERNAL MEDICINE                    | 52109                                                                          |
| NEUROLOGY                            | 884                                                                            |
| NEUROSURGERY                         | -3264                                                                          |
| OBSTETRICS AND GYNAECOLOGY           | 31550                                                                          |
| OPHTHALMOLOGY                        | 13223                                                                          |
| ORTHOPAEDIC SURGERY                  | 40037                                                                          |
| OTOLARYNGOLOGY                       | 18869                                                                          |
| PAEDIATRICS                          | -8198                                                                          |
| PHYSICAL MEDICINE                    | 6059                                                                           |
| PLASTIC SURGERY                      | 30128                                                                          |
| PSYCHIATRY                           | -11768                                                                         |
| THORACIC SURGERY                     | 185857                                                                         |
| UROLOGY                              | 45767                                                                          |
| Overall Difference                   | 55623                                                                          |

Note: The differences calculated in these tables are estimates. They are based on the integrity of the National Physician Database, which relies partially on physician self-reporting. In cases where the fee-for-service billings are similar to total payments, the difference between the two numbers might be slightly negative because of the slight uncertainty surrounding these estimates.
